# Supplementary material
Source: publisher figshare collection journal article supplement (https://acs.figshare.com/ndownloader/files/21241728)
Supplement: Supplementary file 1 [file 21241728]

Supporting Information

**Engineering the Orientation, Density and Flexibility of Single Domain  
Antibodies on Nanoparticles to Improve Cell Targeting.**

Ken W. Yong, Daniel Yuen, Moore Z. Chen, Angus P. R. Johnston\*

Drug Delivery, Disposition and Dynamics, Monash Institute of Pharmaceutical Sciences, Monash University, Parkville, Victoria 3052, Australia

ARC Centre of Excellence in Convergent Bio-Nano Science and Technology, Monash University, Parkville, Victoria 3052, Australia

\*Email address of the corresponding author: [angus.johnston@monash.edu](mailto:angus.johnston@monash.edu)

## Characterization of sdAb conjugated Qdots.

Cryo-electron microscopy images (Figure S1) indicate that Qdots do not aggregate and retain their structure after immobilization of sdAbs onto Qdots even in cell media.

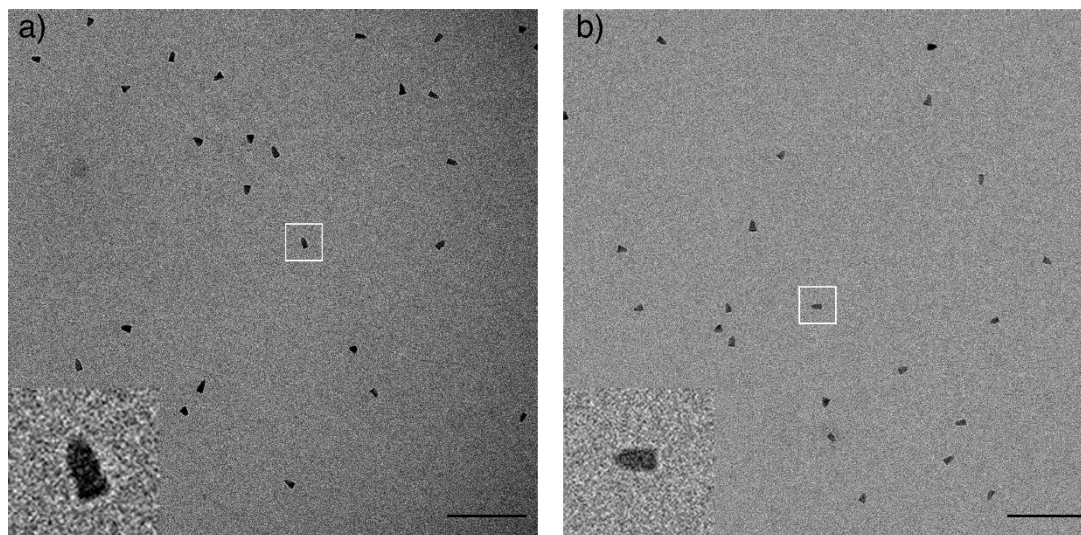

**Figure S1.** Cryo-electron microscopy images of a) azPhe13 oriented sdAb-Qdots and b) unmodified Qdots in Dulbecco's Modified Eagle Medium supplemented with 10% fetal bovine serum. Individual Qdots can be seen in a zoomed in image at bottom left corner of corresponding image. Individual sdAb-Qdots were found to be approximately  $11.4 \pm 1.0$  nm x  $7.2 \pm 0.5$  nm,  $n=10$ . Scale bar = 100 nm

The zeta potential shown on Table S1 summarizes the shift in surface charge with presence of sdAb. A small decrease in zeta potential was observed with increasing linker PEG length.

| Group                                | Zeta Potential (mV) |
|--------------------------------------|---------------------|
| Unmodified Qdot                      | $-19 \pm 1$         |
| azPhe13                              | $-10 \pm 4$         |
| azPheCT                              | $-7 \pm 2$          |
| Random orientation                   | $-11 \pm 3$         |
| azPhe13 PEG <sub>4</sub>             | $-14 \pm 3$         |
| azPheCT PEG <sub>4</sub>             | $-19 \pm 3$         |
| Random orientation PEG <sub>4</sub>  | $-16 \pm 1$         |
| azPhe13 PEG <sub>12</sub>            | $-29 \pm 1$         |
| azPheCT PEG <sub>12</sub>            | $-29 \pm 3$         |
| Random orientation PEG <sub>12</sub> | $-31 \pm 1$         |

**Table S1.**  $\zeta$  potential changes after immobilization of sdAb-biotin modification to Qdots. Data are presented as mean  $\pm$  SD of  $n = 3$  independent experiments.

Previous results indicated that the conjugated sdAb-Qdots demonstrated similar absorbance and fluorescence intensity to the unmodified Qdots in PBS and in cell media (DMEM).<sup>1</sup>

Data for determining the number of sdAb per Qdot was acquired from  $n = 3$  independent experiments.<sup>2,3</sup> Figure S2 and Table S2 show example analysis from one of these independent experiments.

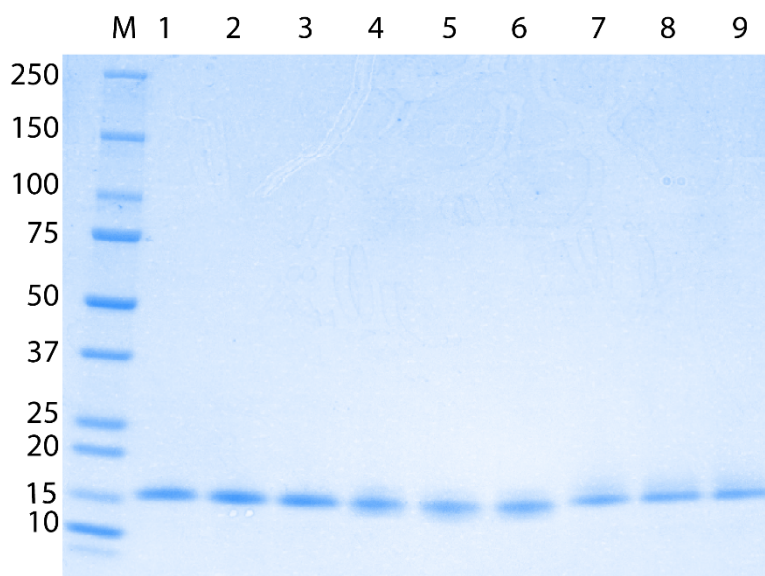

**Figure S2.** Non-reducing Coomassie stained SDS-PAGE of sdAb-biotin conjugate. A fixed amount of sdAb (138 pmole) was added to each lane (Lanes 1-3 (azPhe13), 4-6 (azPhe13 PEG<sub>4</sub>) and 7-9 (azPhe13 PEG<sub>12</sub>)). Lanes 2, 5 and 8 were mixed with 2.3 pmole of Qdots and lanes 3, 6 and 9 were mixed with 1 pmole of Qdots. Unbound sdAbs can be seen as a single band at approximately 15 kDa. Fiji software was used to determine the density of each band (Table S2).

| Lane | Sample                    | sdAb<br>(pmole) | Qdot<br>(pmole) | Density value | Difference | sdAb<br>bound (%) | sdAb per<br>Qdot |
|------|---------------------------|-----------------|-----------------|---------------|------------|-------------------|------------------|
| 1    | azPhe13                   | 138             | -               | 12910.3       | -          | NA                | -                |
| 2    | azPhe13                   | 138             | 2.3             | 11833.1       | 1077.2     | 8.3               | 5                |
| 3    | azPhe13                   | 138             | 1.0             | 11112.3       | 1798.0     | 13.9              | 19               |
| 4    | azPhe13 PEG <sub>4</sub>  | 138             | -               | 12102.1       | -          | NA                | -                |
| 5    | azPhe13 PEG <sub>4</sub>  | 138             | 2.3             | 10699.8       | 1402.3     | 11.6              | 7                |
| 6    | azPhe13 PEG <sub>4</sub>  | 138             | 1.0             | 9889.9        | 2212.2     | 18.3              | 25               |
| 7    | azPhe13 PEG <sub>12</sub> | 138             | -               | 10008.9       | -          | NA                | -                |
| 8    | azPhe13 PEG <sub>12</sub> | 138             | 2.3             | 8754.6        | 1254.3     | 12.5              | 8                |
| 9    | azPhe13 PEG <sub>12</sub> | 138             | 1.0             | 8590.0        | 1418.9     | 14.2              | 20               |

**Table S2.** The free sdAb band density analyzed from Figure S2 was used to calculate the percentage of sdAb bound to Qdots and subsequently the number of sdAb bound per Qdot.

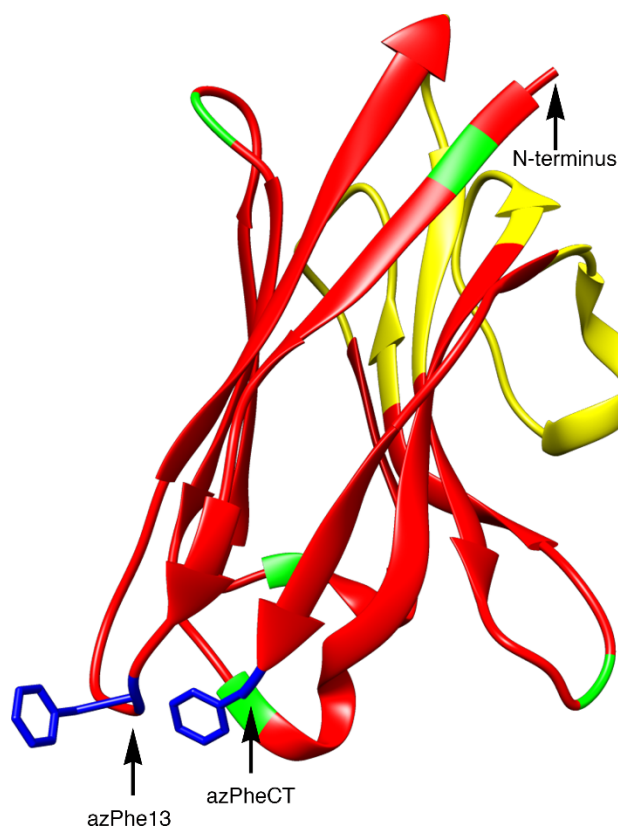

**Figure S3.** 3D representation of anti-EGFR sdAb. The binding site of sdAb is highlighted in yellow and azPhe incorporation (blue) replacing original glutamine-13 amino acid (azPhe13) or incorporation at C-terminus (azPheCT). Lysine residues are highlighted in green to show possible orientation of sdAb when NHS conjugation was used.

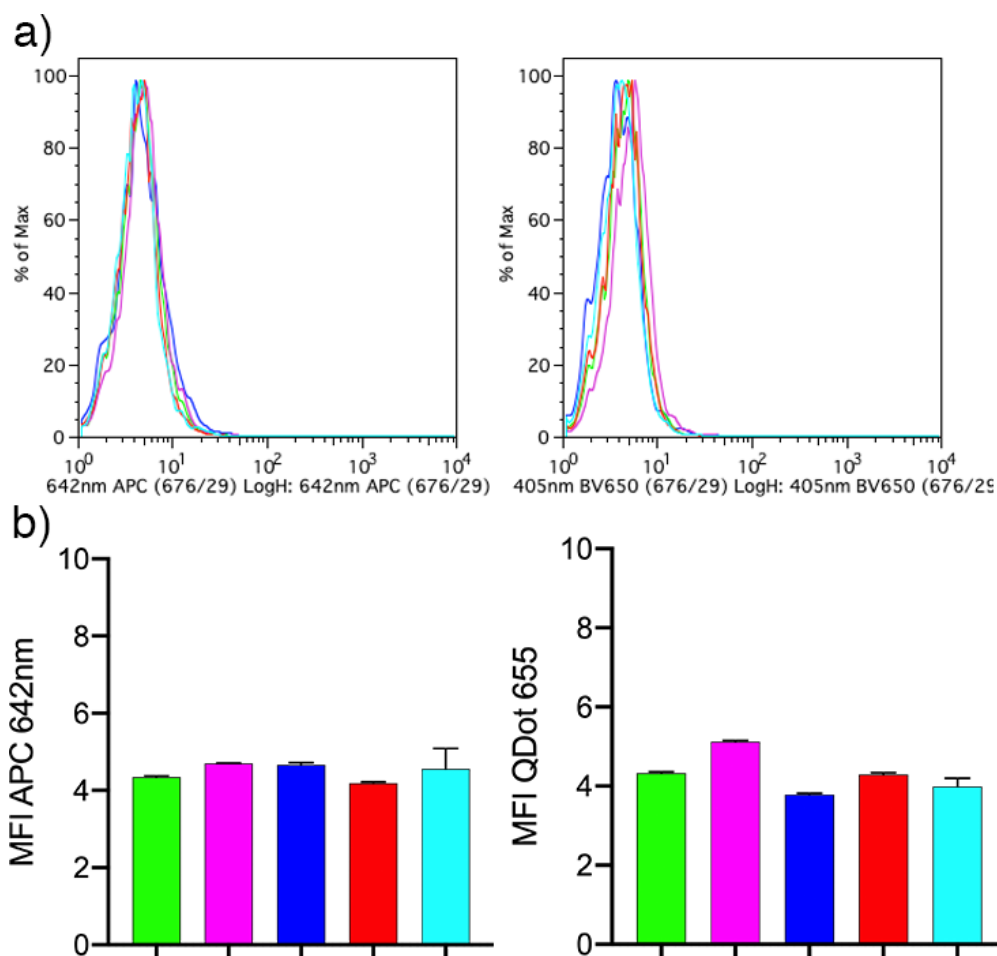

**Figure S4.** Mean fluorescence intensity of EGRF- 3T3 cells incubated with azPhe13 PEG<sub>4</sub> Qdots on a) raw flow cytometry histogram and b) analyzed histograms of 3T3-incubated cells. As a control, cetuximab (labeled with Cy5) was used alongside azPhe13 PEG<sub>4</sub> Qdots. Additionally, a higher concentration of azPhe13 PEG<sub>4</sub> Qdots (1.5 nM) was added to cells. Green – 1 nM azPhe13 PEG<sub>4</sub> Qdots, magenta – 1.5 nM azPhe13 PEG<sub>4</sub> Qdots, blue – cetuximab, red – unmodified Qdots, turquoise – untreated cells.

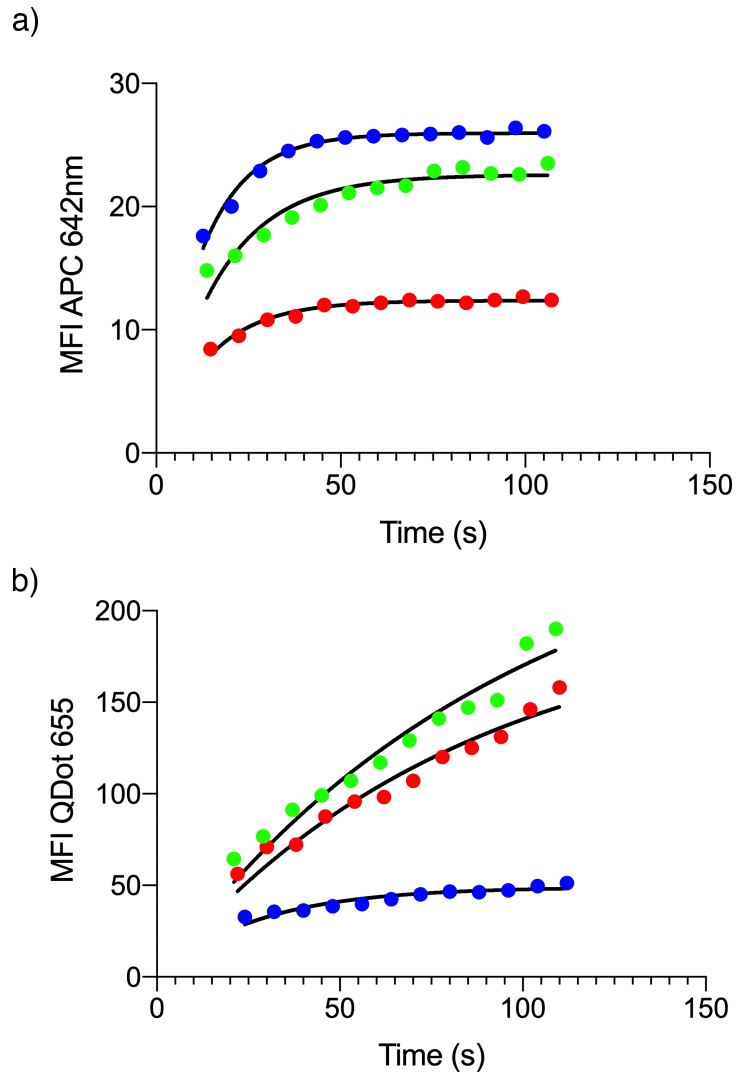

**Figure S5.** MFI signal of a) monovalent sdAb-Cy5 (40 nM) and b) multivalent sdAb-Qdot (1.5 nM) over 100 seconds as measured from flow cytometry under energy depleting condition. Green – azPhe13 sdAbs, red – azPheCT sdAbs and blue – wild-type/randomly oriented sdAbs.

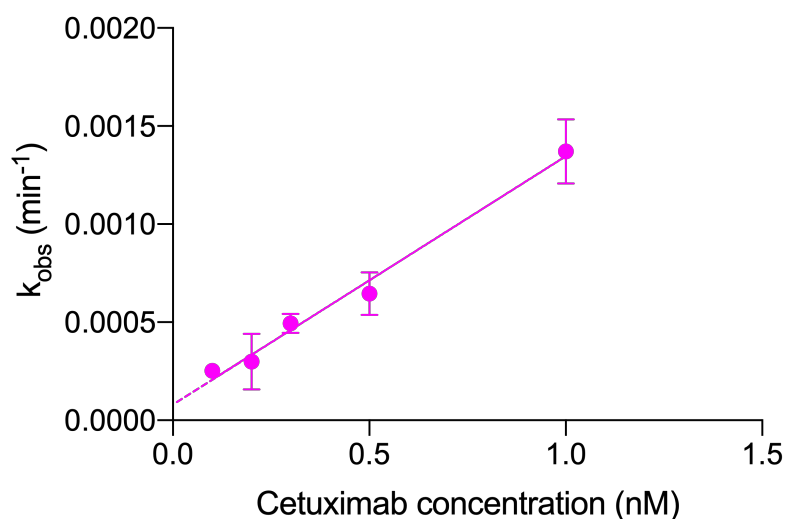

**Figure S6.** The  $k_{on}$  and  $k_{off}$  of Cetuximab can be calculated based on linear regression fit determined from  $k_{obs}$ . Data are presented as mean  $\pm$  SEM of  $n = 3$  independent experiments.

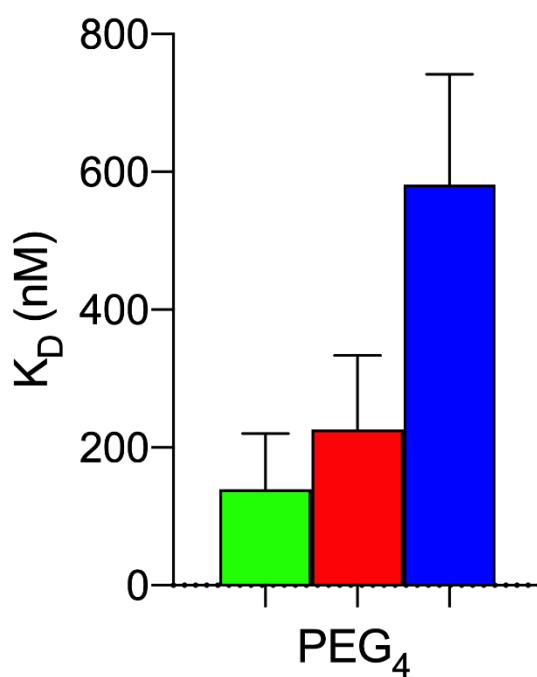

**Figure S7.** Biotinylated sdAbs with different linker lengths were immobilized onto streptavidin biosensors followed by the addition of free recombinant EGFR to simulate Qdot surface from BLItz. Data are presented as mean  $\pm$  SD of  $n = 3$  independent experiments. Green – azPhe13 sdAbs, red – azPheCT sdAbs and blue – randomly oriented sdAbs.

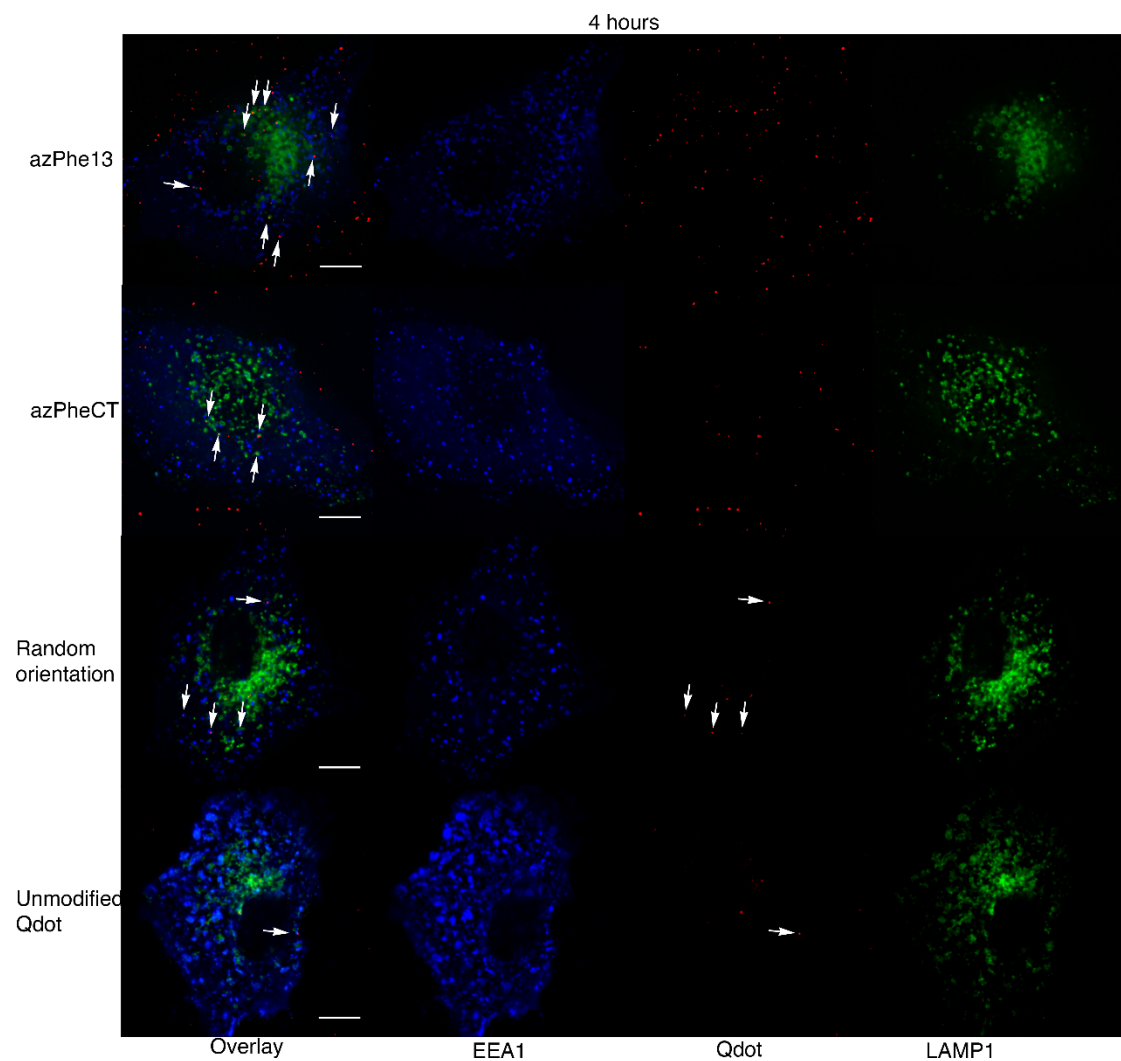

**Figure S8.** Co-localization of azPhe13, azPheCT, randomly oriented sdAb and unmodified Qdot (red) on to GFP-EEA1 (blue) or mApple-LAMP1 (green) transfected A549 cells at 4 hours. Scale bars = 10  $\mu$ m

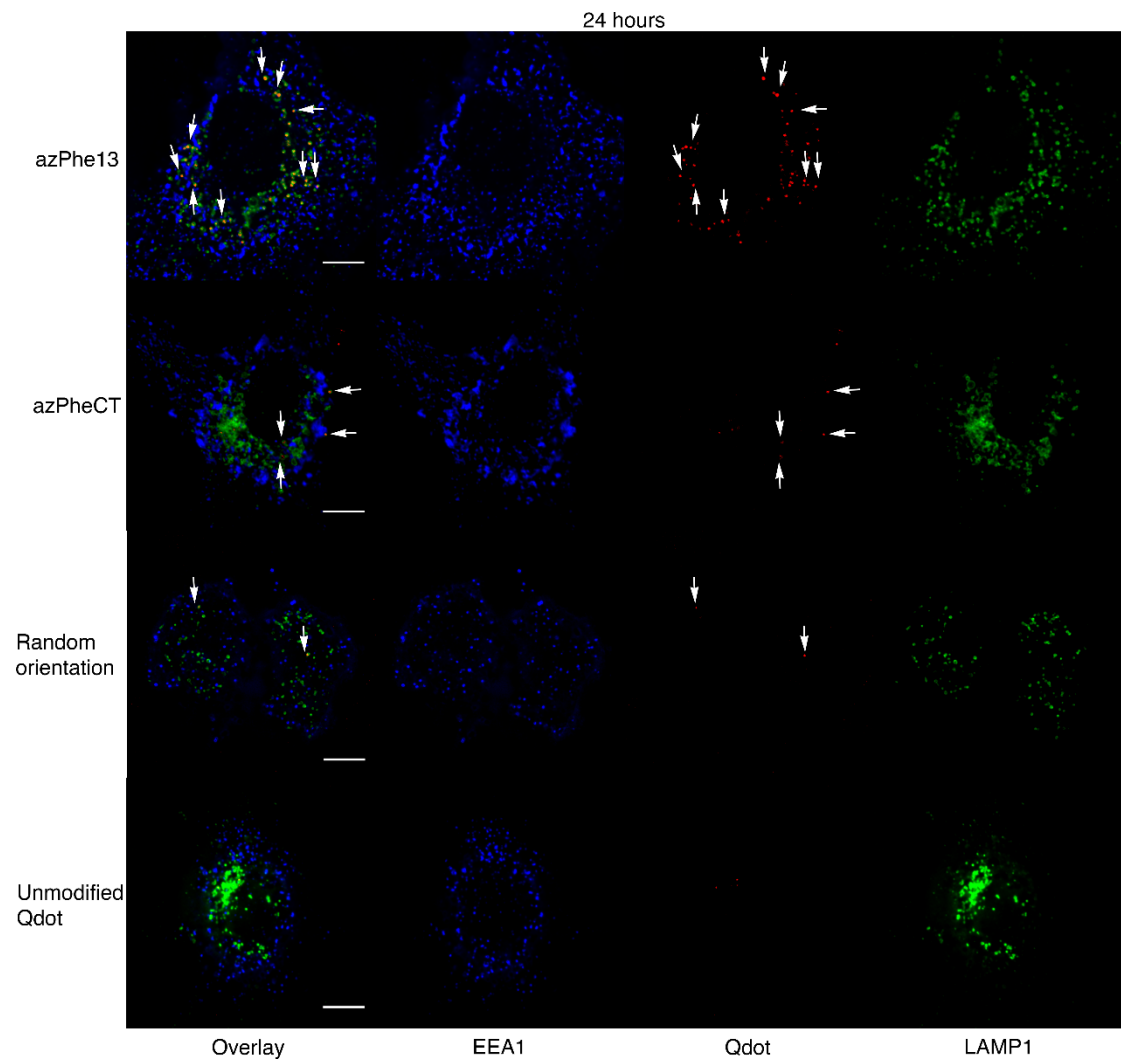

**Figure S9.** Co-localization of azPhe13, azPheCT, randomly oriented sdAb and unmodified Qdot (red) on to GFP-EEA1 (blue) or mApple-LAMP1 (green) transfected A549 cells at 24 hours. Scale bars = 10  $\mu$ m

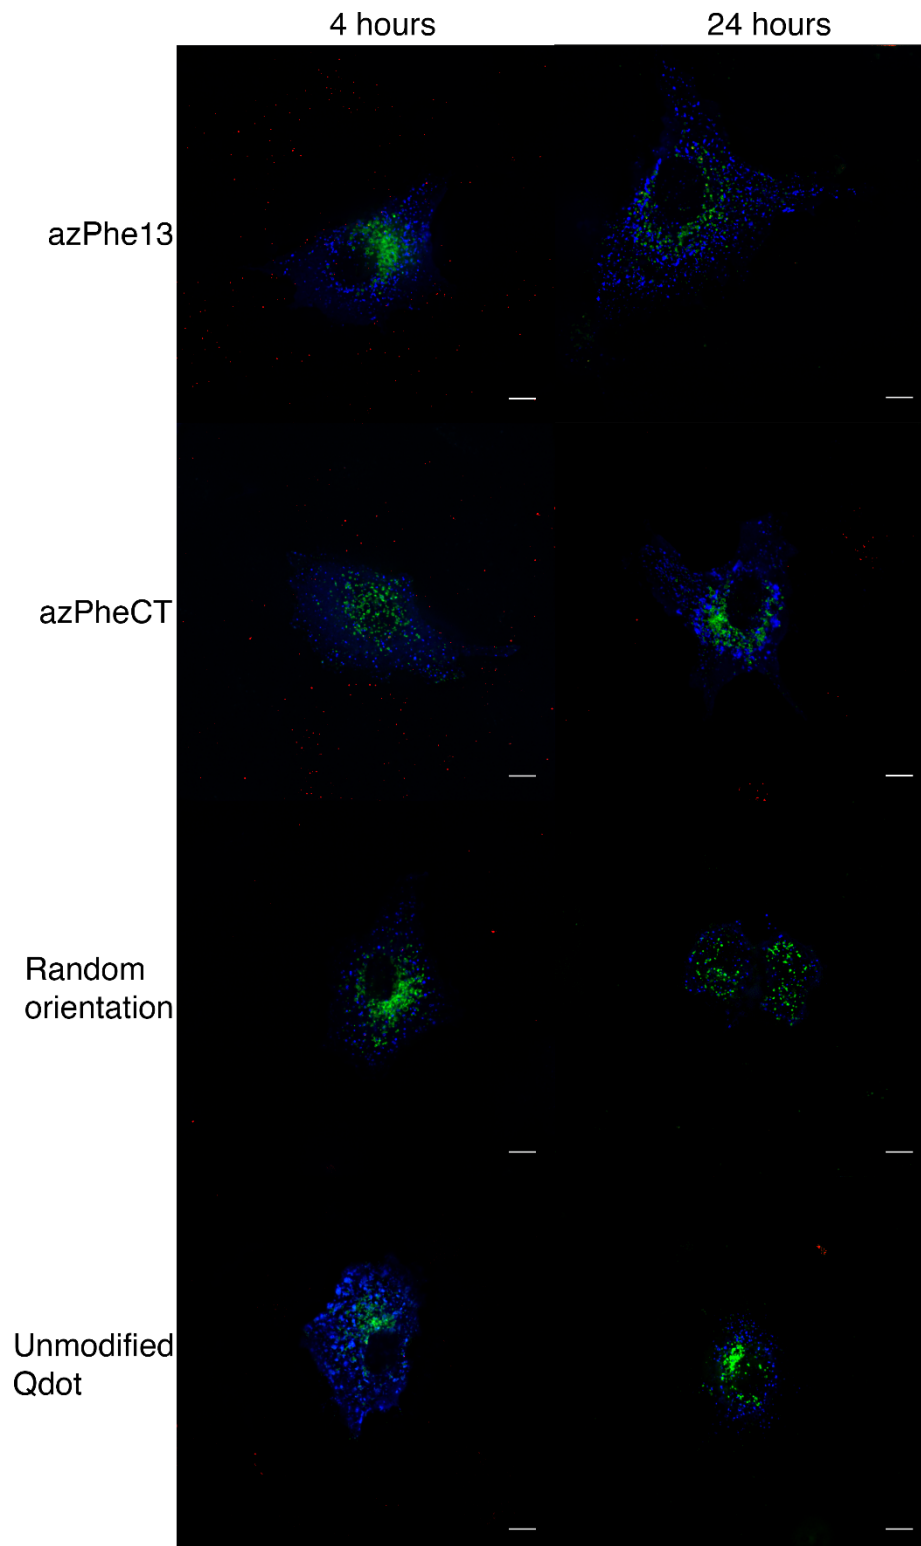

**Figure S10.** Co-localization of azPhe13, azPheCT, randomly oriented sdAb and unmodified Qdot (red) on to GFP-EEA1 (blue) or mApple-LAMP1 (green) transfected A549 cells at 4 and 24 hours. Scale bars = 10  $\mu$ m

## References

- (1) Yong, K. W.; Yuen, D.; Chen, M. Z.; Porter, C. J. H.; Johnston, A. P. R. Pointing in the Right Direction: Controlling the Orientation of Proteins on Nanoparticles Improves Targeting Efficiency. *Nano Lett.* **2019**, *19* (3), 1827–1831.
- (2) Schindelin, J.; Arganda-Carreras, I.; Frise, E.; Kaynig, V.; Longair, M.; Pietzsch, T.; Preibisch, S.; Rueden, C.; Saalfeld, S.; Schmid, B.; Tinevez, J. Y.; White, D. J.; Hartenstein, V.; Eliceiri, K.; Tomancak, P.; Cardona, A. Fiji: An Open-Source Platform for Biological-Image Analysis. *Nat. Methods* **2012**, *9* (7), 676–682.
- (3) Pathak, S.; Davidson, M. C.; Silva, G. A. Characterization of the Functional Binding Properties of Antibody Conjugated Quantum Dots. *Nano Lett.* **2007**, *7* (7), 1839–1845.
